# Supplementary material for: Hierarchical CuBi2O4 microspheres as lithium-ion battery anodes with superior high-temperature electrochemical performance
Source: Royal Society of Chemistry journal article supplement (doi:10.1039/c6ra27216a), 2017-01-01
Supplement: c6ra27216a1.pdf [file c6ra27216a1.pdf]

## Electronic Supplementary Information (ESI)

### **Hierarchical CuBi<sub>2</sub>O<sub>4</sub> microspheres as lithium-ion batteries anode with superior high-temperature electrochemical performance**

Hong Yin,<sup>†</sup> Ming-Lei Cao,<sup>†</sup> Xiang-Xiang Yu,<sup>†</sup> Chong Li, Yan Shen, Ming-Qiang

Zhu\*

Wuhan National Laboratory for Optoelectronics (WNLO), School of Optics and  
Electronic Information, Huazhong University of Science and Technology, Wuhan  
430074, China

[<sup>†</sup>] These authors contributed equally to this work.

\*Corresponding Authors

E-mail: mqzhu@hust.edu.cn

**Table S1-S2 and Figure S1-S7**

**Table S1** Quantification report of  $\text{CuBi}_2\text{O}_4$

| Peak | Position BE (ev) | Atomic Mass | Atomic Conc % | Mass Conc % |
|------|------------------|-------------|---------------|-------------|
| Cu   | 933.802          | 63.549      | 3.38          | 7.32        |
| O    | 529.702          | 15.999      | 23.23         | 14.41       |
| C    | 285.102          | 12.011      | 66.95         | 31.57       |
| Bi   | 158.752          | 208.980     | 6.45          | 46.70       |

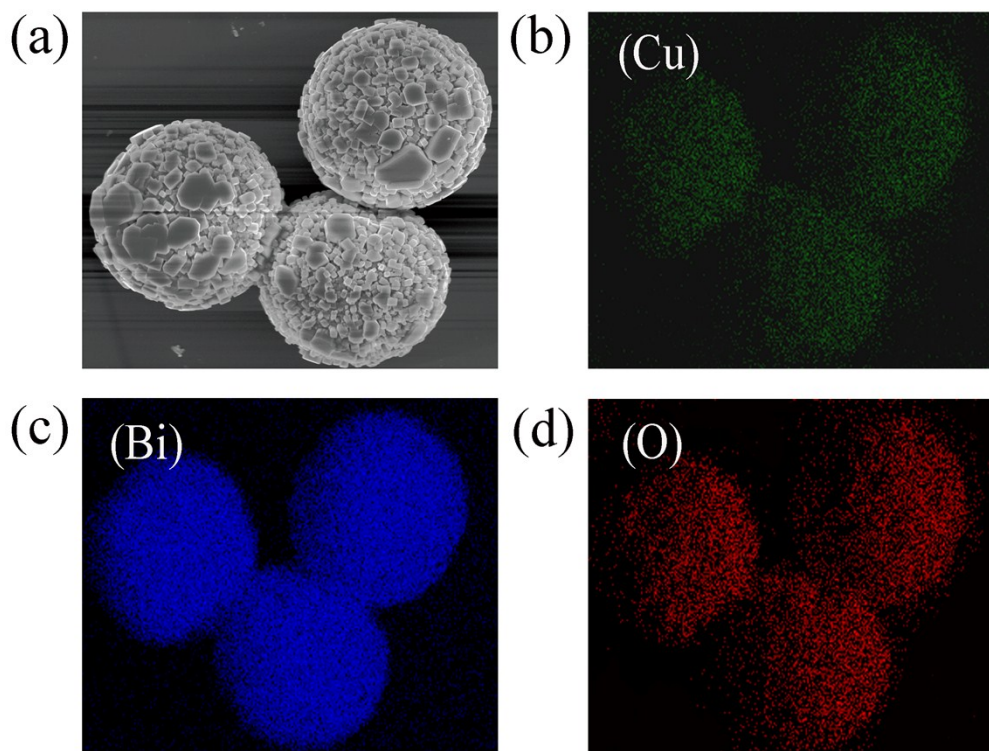

**Fig. S1** (a) SEM image. (b), (c) and (d) are EDX mapping of hierarchical  $\text{CuBi}_2\text{O}_4$  microspheres from SEM.

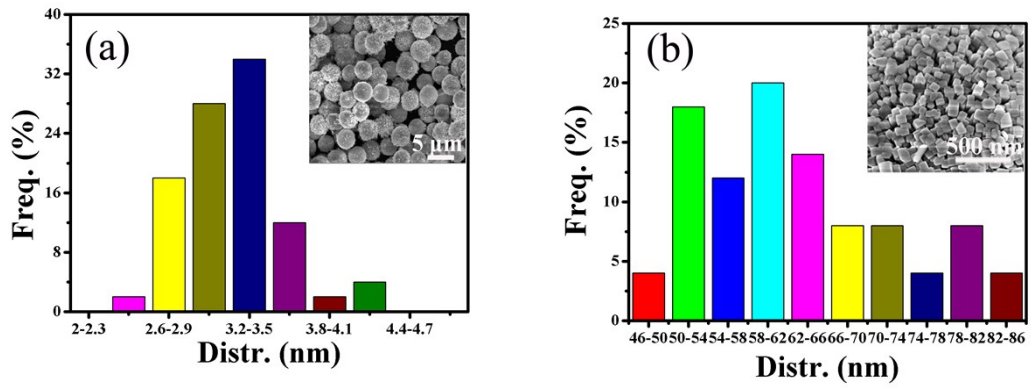

**Fig. S2** (a) The size distribution of hierarchical  $\text{CuBi}_2\text{O}_4$  microspheres, (b) The size distribution of the nanoparticles.

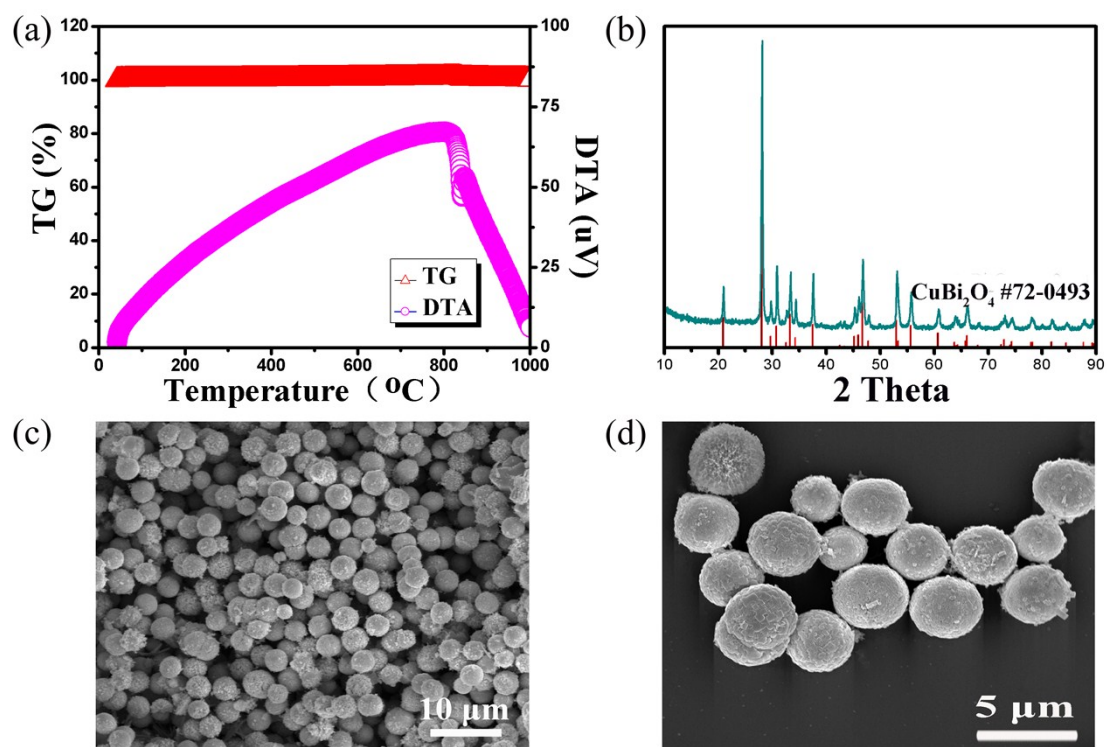

**Fig. S3** (a) The TG-DTA curves of the hierarchical CuBi<sub>2</sub>O<sub>4</sub> microspheres from room temperature to 1000 °C in air, (b) XRD patterns of the hierarchical CuBi<sub>2</sub>O<sub>4</sub> microspheres after 500 °C calcination, (c) and (d) The different magnification of the CuBi<sub>2</sub>O<sub>4</sub> microspheres after 500 °C calcination.

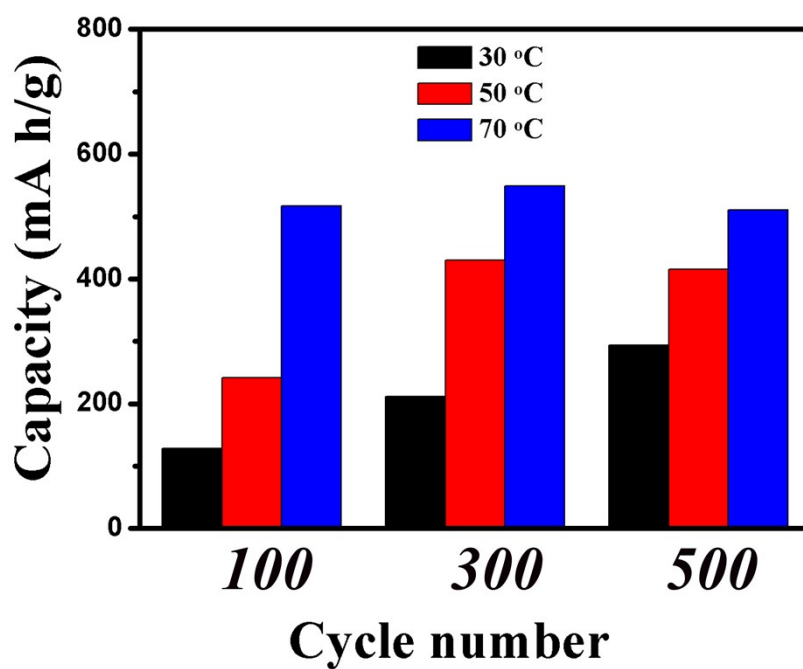

**Fig. S4** Discharge capacities versus cycle number of hierarchical CuBi<sub>2</sub>O<sub>4</sub> microsphere anodes vs Li at a current density of 100 mA·g<sup>-1</sup>.

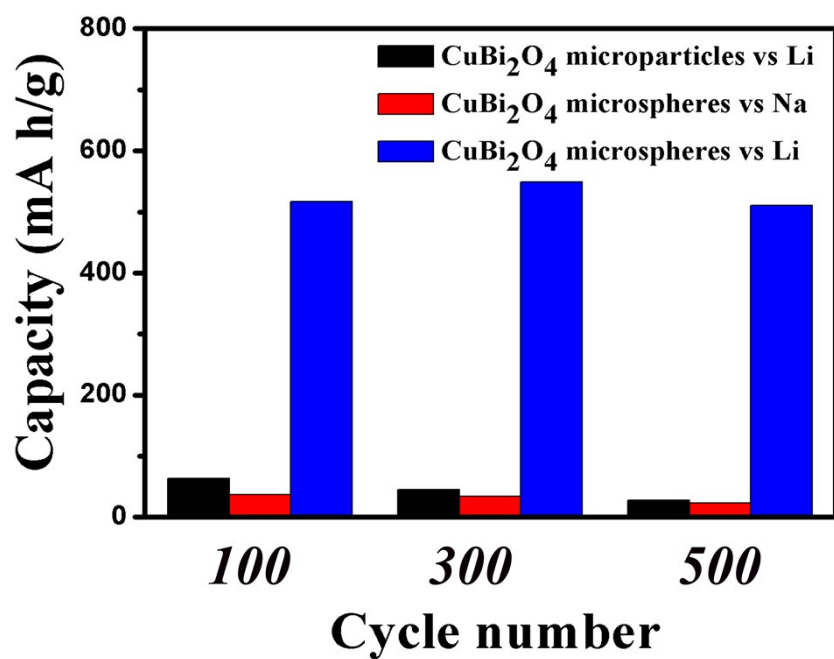

**Fig. S5** Discharge capacities versus cycle number of microparticle anodes vs Li and hierarchical CuBi<sub>2</sub>O<sub>4</sub> microsphere anodes vs Li and Na at a current density of 100 mA·g<sup>-1</sup> (70 °C).

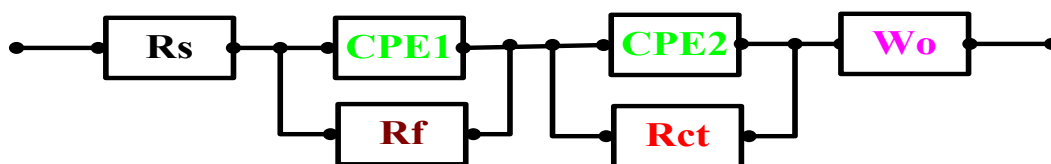

**Fig. S6** Equivalent circuit model for the hierarchical  $\text{CuBi}_2\text{O}_4$  microsphere anodes.



**Table S2** The fitting data of EIS

| T/°C | $R_s/\Omega$ | $R_f/\Omega$ | $R_{ct}/\Omega$ | $W_o-R/\Omega$ |
|------|--------------|--------------|-----------------|----------------|
| 30   | 10.2         | 325.8        | 785.2           | 665.2          |
| 50   | 14.17        | 280.2        | 369.2           | 3224           |
| 70   | 3.8          | 143.3        | 245.1           | 291.5          |

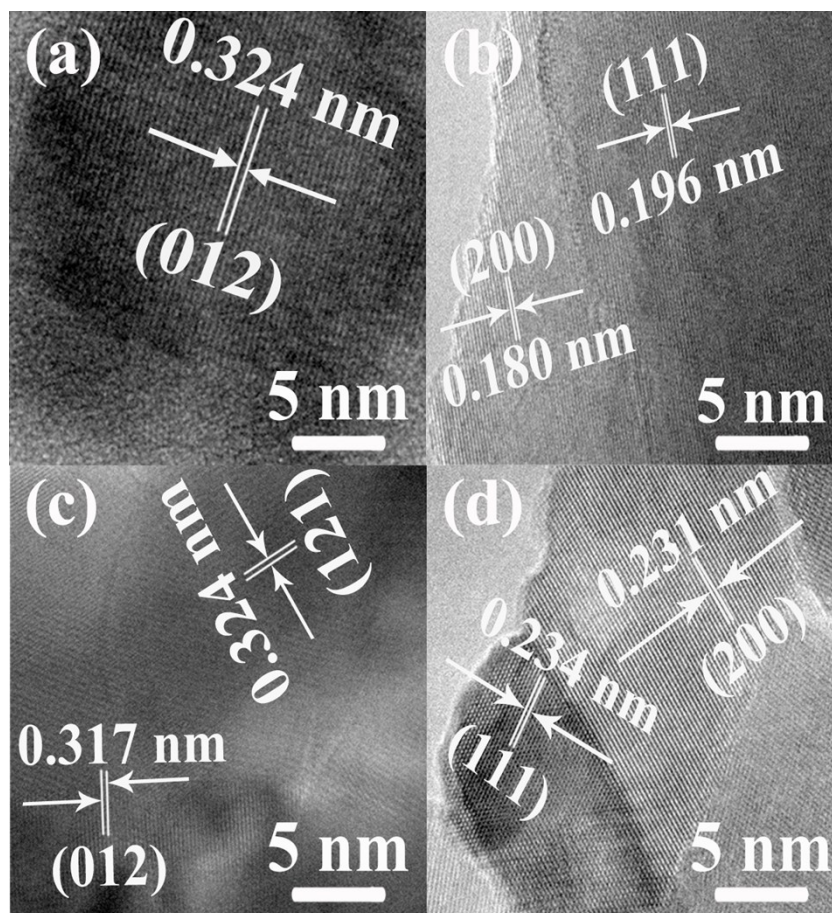

**Fig. S7** (a), (b), (c) and (d) high-resolution TEM images for Bi, Cu, Bi<sub>2</sub>O<sub>3</sub> and CuO during discharge-charge processes, respectively.
